# Supplementary material for: Akt Activation Is Responsible for Enhanced Migratory and Invasive Behavior of Arsenic-Transformed Human Bronchial Epithelial Cells
Source: PubMed Central journal article supplement (PMC3261952; doi:10.1289/ehp.1104061), 2011-09-27
Supplement: ehp.1104061.s001.pdf [file ehp.1104061.s001.pdf]

## **Supplemental Materials**

Akt Activation is Responsible for Enhanced Migratory and Invasive Behavior of Arsenic-Transformed Human Bronchial Epithelial Cells

Zhishan Wang, Junling Yang, Theresa Fisher, Hua Xiao, Yiguo Jiang,  
Chengfeng Yang

### **Table of Contents**

|                             |        |
|-----------------------------|--------|
| Supplementary Figure 1..... | Page 2 |
| Supplementary Figure 2..... | Page 3 |
| Reference.....              | Page 4 |

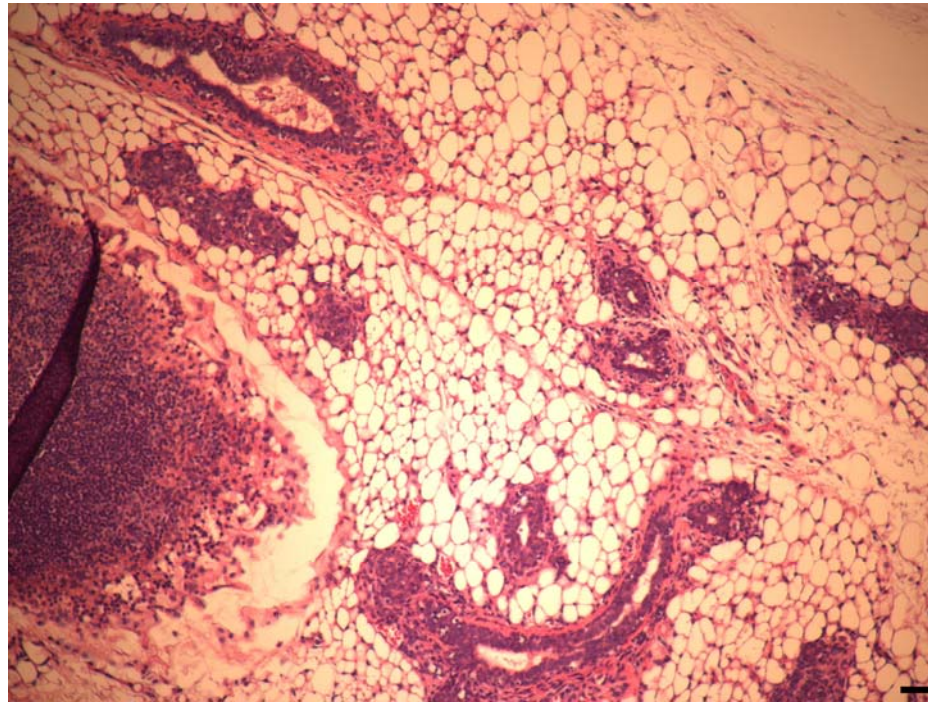

**Supplementary Figure 1. Representative H & E staining of mouse xenograft tumor and surrounding fat tissues.** The mouse xenograft tumor was produced from subcutaneous inoculation of arsenic-transformed HBECs (As-p53<sup>low</sup>HBEC-GFP) (Wang et al. 2011) and H & E staining was carried out as described in Materials and Methods. Scale bar: 100  $\mu$ m.

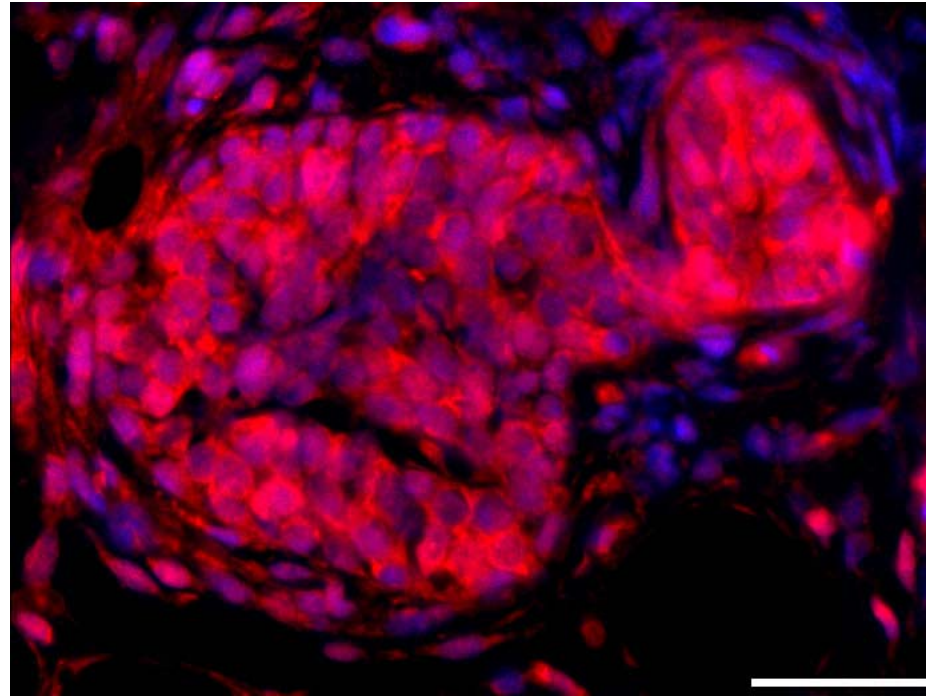

**Supplementary Figure 2. Representative immunofluorescence staining of anti-thyroid transcription factor 1 (TTF-1) in mouse xenograft tumor surrounding tube-like structure.** Tissue sections from nude mouse xenograft tumors produced by subcutaneous injection of arsenic-transformed HBECs (As-p53<sup>low</sup>HBEC-GFP) were stained with anti-TTF1 as described in Materials and Methods. Nuclei were counterstained with 4',6-diamidino-2-phenylindole (DAPI) (blue). The overlaid fluorescence image was made from anti-TTF1 staining (red color) and nucleus DAPI staining (blue color). Scale bar: 100  $\mu$ m.

## Reference

Wang Z, Zhao Y, Smith E, Goodall GJ, Drew PA, Brabletz T, et al. 2011. Reversal and Prevention of Arsenic-Induced Human Bronchial Epithelial Cell Malignant Transformation by microRNA-200b. *Toxicol Sci* 121(1):110-122.
